# Supplementary material for: Easily recoverable and reusable p-toluenesulfonic acid for faster hydrolysis of waste polyethylene terephthalate
Source: Royal Society of Chemistry journal article supplement (doi:10.1039/d1gc04567a), 2022-01-01
Supplement: d1gc04567a1.pdf [file d1gc04567a1.pdf]

1 **Easily Recoverable and Reusable p-toluenesulfonic Acid for Faster**

2 **Hydrolysis of Waste Polyethylene Terephthalate**

3 Weisheng Yang <sup>a</sup>, Juan Wang <sup>a</sup>, Liang Jiao <sup>c</sup>, Yang Song <sup>a</sup>, Chang Li <sup>a</sup>, Chaoquan Hu <sup>a,b\*</sup>

4 <sup>a</sup> Nanjing IPE Institute of Green Manufacturing Industry, Nanjing, Jiangsu, 211135, China.

5 <sup>b</sup> State Key Laboratory of Multiphase Complex Systems, Institute of Process Engineering,

6 Chinese Academy of Sciences, Beijing, 100190, China.

7 <sup>c</sup> Jiangsu Co-innovation Center for Efficient Processing and Utilization of Forestry Resources,

8 Nanjing Forestry University, Nanjing, Jiangsu, 210037, China.

9

10 **\* Corresponding Authors**

11 Chaoquan Hu. E-mail: [cqhu@ipe.ac.cn](mailto:cqhu@ipe.ac.cn)

12

13

14

15

16

17

18

19

20

21

22

23

24

25

## 26 **Characterizing the intrinsic viscosity of recycled PET powders**

27 The intrinsic viscosity (IV) ( $\text{dL g}^{-1}$ ) of recycled PET powders was measured via Ubbelohde  
28 viscometer at 25 °C. First, 0.005 g/mL PET solution was obtained by dissolve certain amount of  
29 recycled PET in phenol/tetrachloroethane (w/w, 3/2). Then, the obtained PET solution was added  
30 into Ubbelohde viscometer to test its outflow time ( $t$ ). Using the same method to determine the  
31 outflow time ( $t_0$ ) of the phenol/tetrachloroethane (w/w, 3/2) solvent. The intrinsic viscosity (IV)  
32 ( $\text{dL g}^{-1}$ ) was calculated from following equation:

$$\text{Intrinsic viscosity} = \frac{0.25\left(\frac{t}{t_0} - 1 + 3\ln\frac{t}{t_0}\right)}{c} \quad (1)$$

34 where,  $c$  is the PET solution concentration (0.005 g/mL).

## 35 **Characterizing the crystallinity of recycled PET powders**

36 The crystallinity of recycled PET powders was calculated through Differential Scanning  
37 Calorimetry (DSC) measurements by using a NETZSCH DSC 200F3 under  $\text{N}_2$  atmosphere. The  
38 sample was heated starting from 30 °C till 300 °C then cooled to 50 °C and again heated to 300  
39 °C at a heating/cooling rate of 10 °C  $\text{min}^{-1}$ . The crystallinity of PET samples was calculated via  
40 following equation:

$$X_c = [(\Delta H_m - \Delta H_{cc}) / \Delta H_m^\circ] \times 100 \quad (2)$$

42 where,  $X_c$  is the crystallinity (%),  $\Delta H_m$  ( $\text{J g}^{-1}$ ) and  $\Delta H_{cc}$  ( $\text{J g}^{-1}$ ) are the measured melt and cold  
43 crystallization enthalpy of waste PET, respectively, and  $\Delta H_m^\circ = 140.1 \text{ J g}^{-1}$  is the melting enthalpy  
44 of 100% crystalline PET.

## 45 **Characterizing the purity of generated TPA and recovered PTSA**

46 Firstly, 0.1 g of TPA purchased from Aladin was weighed and dissolved in 6 mL of a 1 mol/L  
47 sodium hydroxide solution. The sodium terephthalate (NaTPA) solution was then diluted to a

48 series of certain concentrations to produce standard solutions of TPA. The standard curve was  
49 drawn by recording the absorbance of the standard solutions at 240 nm (Figure S1a). To detect the  
50 purity of the produced TPA, a solution of NaTPA was prepared by the same procedure as the  
51 standard solutions.

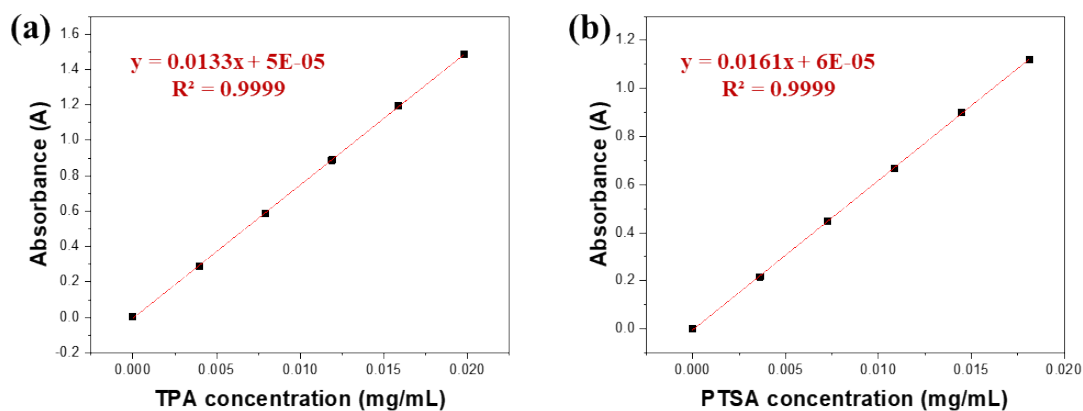

52

53 Figure S1. (a) The standard curve drawn based on the UV absorption values of vary concentrations  
54 of TPA at 240 nm wavelength. (b) The standard curve drawn based on the UV absorption values  
55 of vary concentrations of PTSA at 222 nm wavelength.

56 Firstly, 0.1 g of PTSA purchased from Aladin was dissolved in 6 mL water. Then, the PTSA  
57 aqueous solution was diluted to a series of concentrations to produce standard solutions of PTSA.  
58 The standard curve was drawn by recording the absorbance of the standard solutions at 222 nm  
59 (Figure S1b). To detect the purity of recovered PTSA (R-PTSA), a certain concentration (0.008-  
60 0.016 mg/mL) of R-PTSA aqueous solution was configured and detect its absorbance at 222 nm.

61

62

63

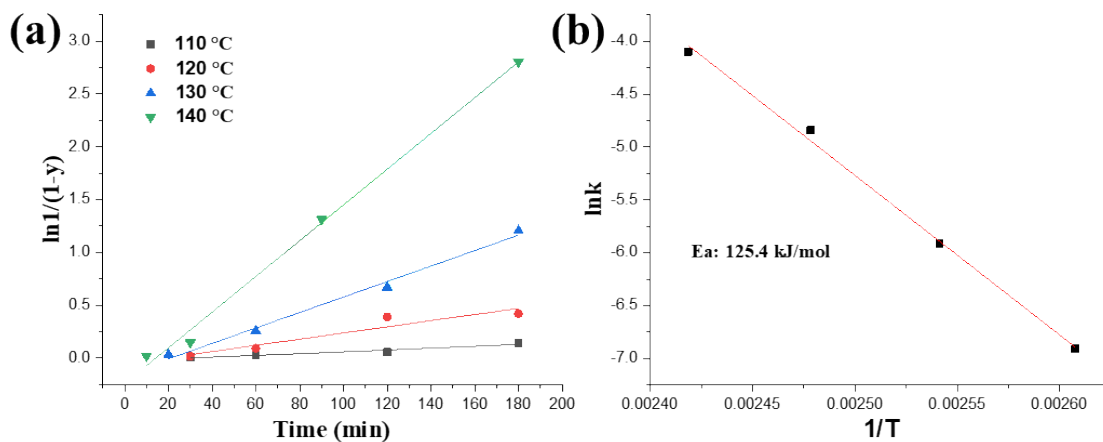

64

65 Figure S2. Hydrolysis kinetics of waste polyethylene terephthalate (PET) flakes with size of 1 cm  
 66 x 1 cm in 80% *p*-toluenesulfonic acid (PTSA) aqueous solution. (a) Rate of waste PET hydrolysis  
 67 at 110°C, 120°C, 130°C, and 140°C, respectively. (b) Arrhenius plot of the rate constant of waste  
 68 PET hydrolysis. Reaction conditions: waste PET, 2.5 g; PTSA concentration, 80%; mass ratio of  
 69 PTSA aqueous solution to waste PET, 20:1.

70

71

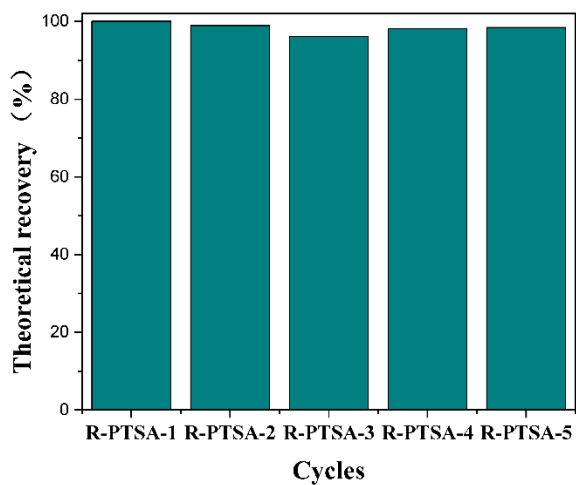

72

73 Figure S3. The theoretical recovery of R-PTSA at different cycles.

74

75

76

Table S1. Values used in Aspen Plus simulations of PET acid-catalyzed hydrolysis.

| Import         |                 |                  | Output         |               |                          |
|----------------|-----------------|------------------|----------------|---------------|--------------------------|
| PET<br>(kg/hr) | PTSA<br>(kg/hr) | Water<br>(kg/hr) | TPA<br>(kg/hr) | EG<br>(kg/hr) | Recycled PTSA<br>(kg/hr) |
| 125            | 2000            | 500              | 104.4          | 38.20         | 1828                     |

77

78

Table S2. Energy recoveries and consumptions in Aspen Plus simulation.

|                      | E0101  | E0102 | R0101   | F0202  | E0201  | T0201-REB | T0201-COND |
|----------------------|--------|-------|---------|--------|--------|-----------|------------|
| Heat duty<br>(kW/hr) | 446.13 | 8.12  | -386.15 | 520.39 | -41.62 | 90.50     | -78.94     |

79

80

81
